# Supplementary material for: Refinement of nanoporous copper by dealloying the Al–Cu alloy in NaOH solution containing sodium dodecyl sulfate
Source: Royal Society of Chemistry journal article supplement (doi:10.1039/d3cp02373g), 2023-01-01
Supplement: d3cp02373g1.pdf [file d3cp02373g1.pdf]

Electronic Supplementary Information

Refinement of Nanoporous Copper by Dealloying AlCu Alloy in NaOH Solution  
Containing Sodium Dodecyl Sulfate

Jie Li<sup>\*a</sup>, Zhi-Bin Yi<sup>b</sup>, Nuo-Tong Li<sup>b</sup>, Na-Na Yu<sup>a</sup> and Hao-Ran Geng<sup>a</sup>

<sup>a</sup> School of Materials Science and Engineering, University of Jinan, No.336 West Road  
of Nan Xinzhuang, Jinan 250022, Shandong Pro., China.

<sup>b</sup> Department of Mechanical and Aerospace Engineering, Hong Kong University of  
Science and Technology, Clear Water Bay, Kowloon, Hong Kong, China.

Corresponding author: Jie Li, [jie.li\\_x@hotmail.com](mailto:jie.li_x@hotmail.com)

Figure. S1

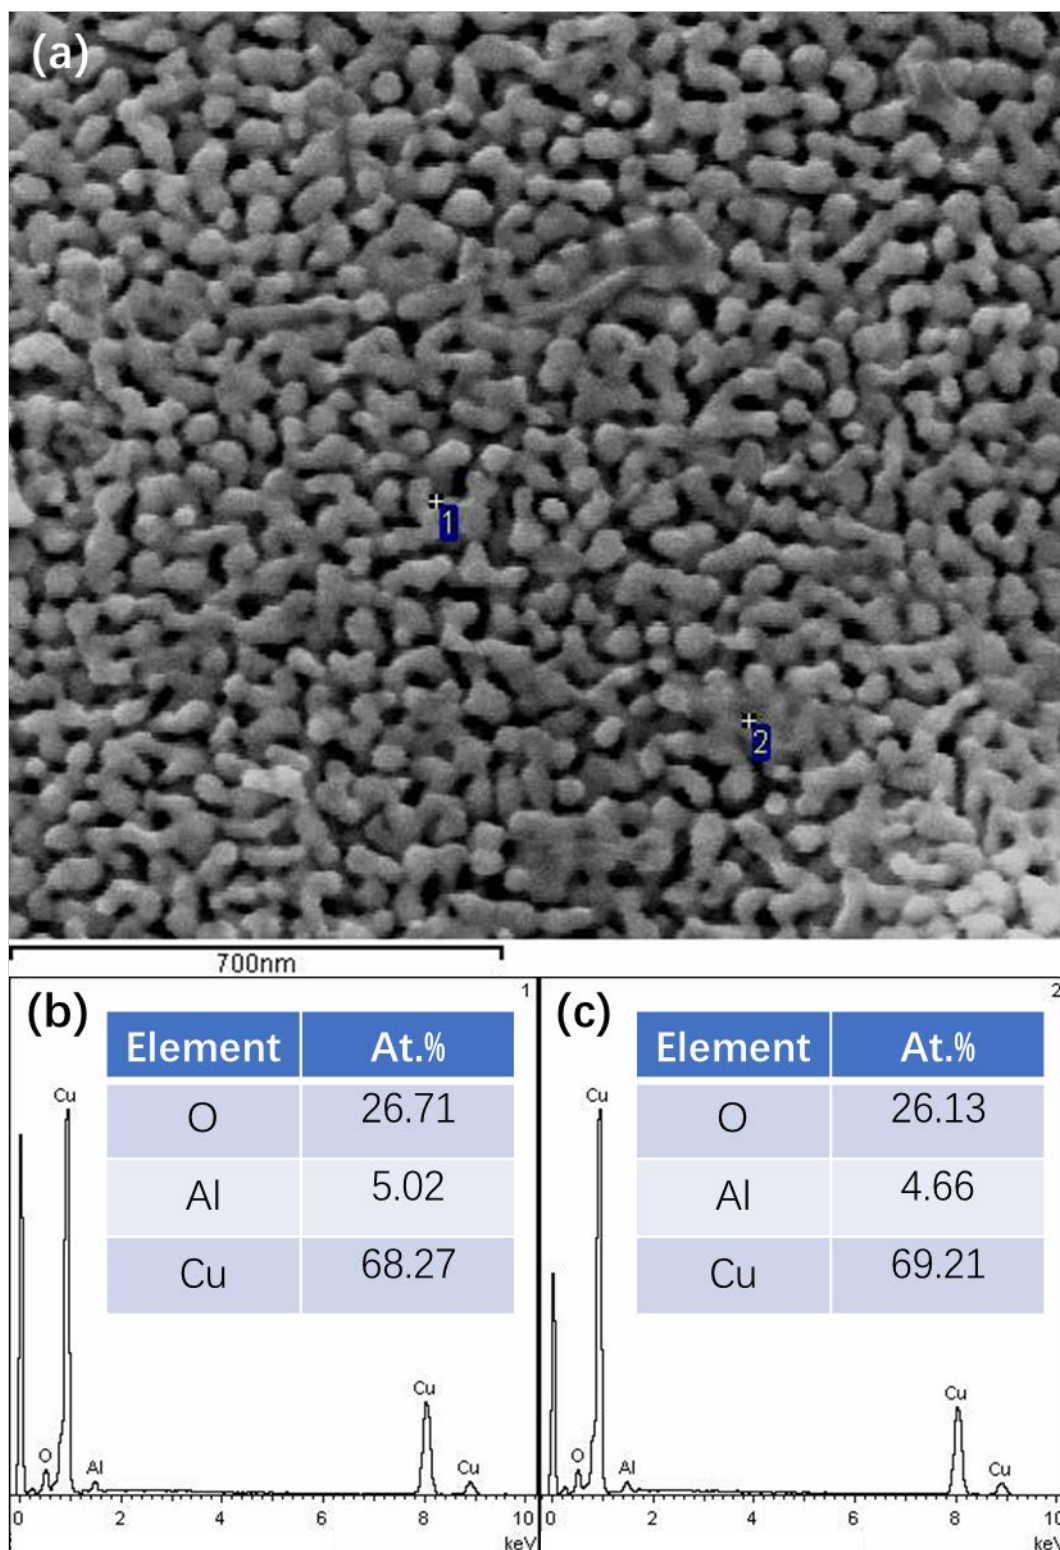

**Figure. S1.** (a) Typical SEM image of the sample obtained from dealloying solution containing 0.5 mM SDS. (b) and (c) present the EDS spectrums and the element content on the ligament (spot 1 in (a)) and adhesion area (spot 2 in (a)), respectively. Al signal might come from the Al sample holder or the residual Al in the dealloyed specimen.

Figure. S2

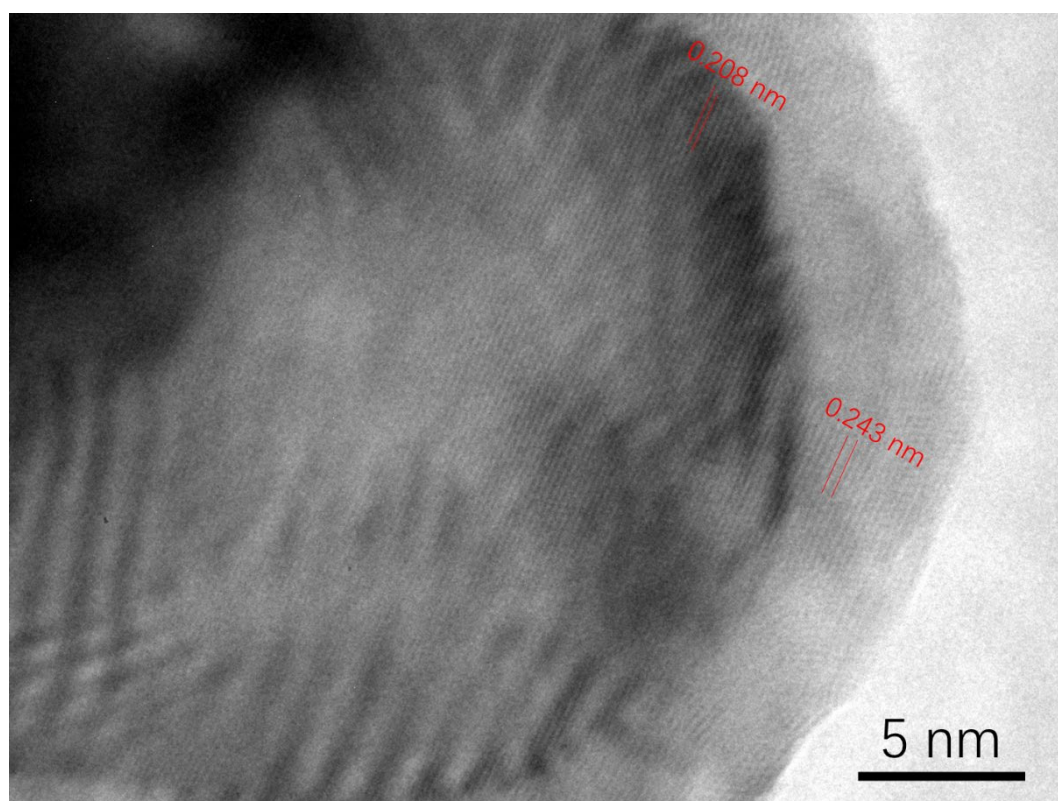

**Figure. S2.** HRTEM image of the region B marked in Figure. 2 in the main text. The interplanar distances of 0.208 nm and 0.243 nm are in perfect agreement with the (111) plane of Cu and (111) plane of  $\text{Cu}_2\text{O}$ , respectively.

Figure. S3

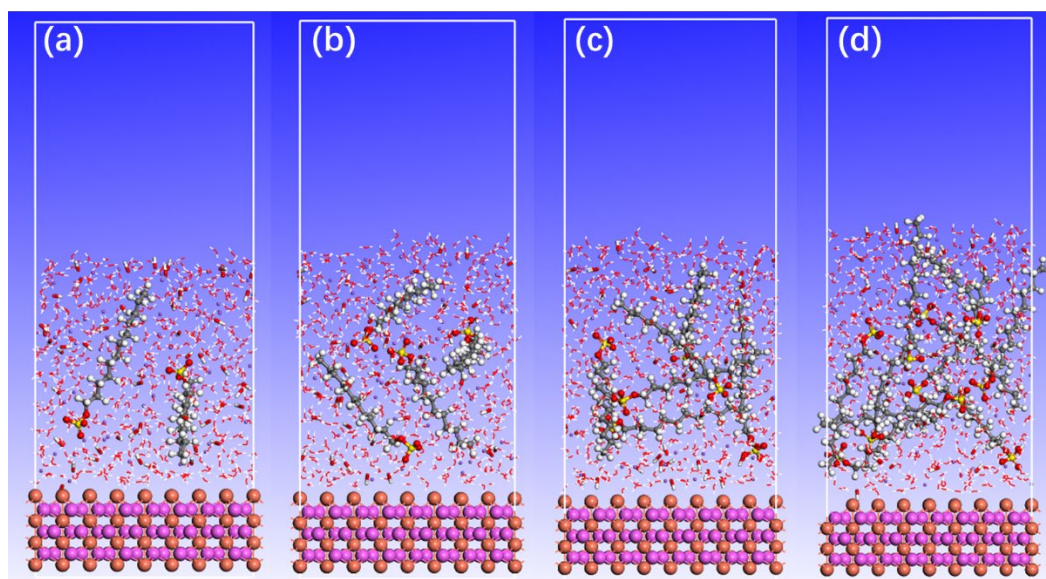

**Figure. S3.** Configurations of solution-alloy systems, respectively, containing (a) 2 SDS, (b) 4 SDS, (c) 6 SDS, and (d) 10 SDS molecules before MD calculation. The amorphous solution layers were randomly constructed by 500 H<sub>2</sub>O, 50 OH<sup>-</sup>,  $x$  SDS, and (50+ $x$ ) Na<sup>+</sup>.

Figure. S4

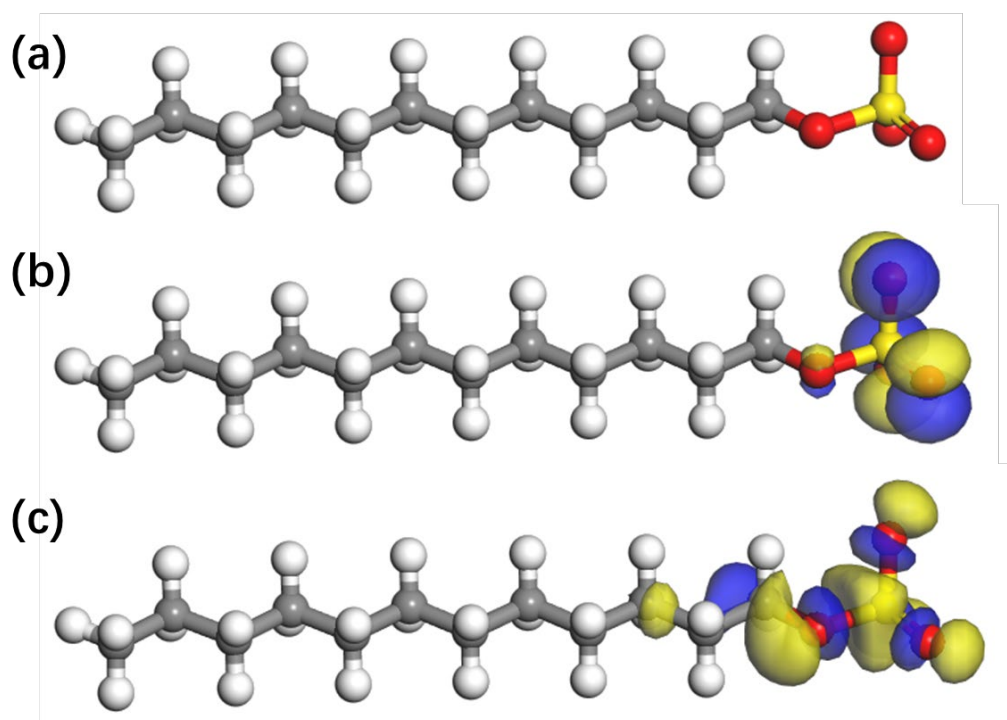

Figure. S4. (a) Optimized structure, (b) HOMO, and (c) LUMO of SDS anion.

Figure. S5

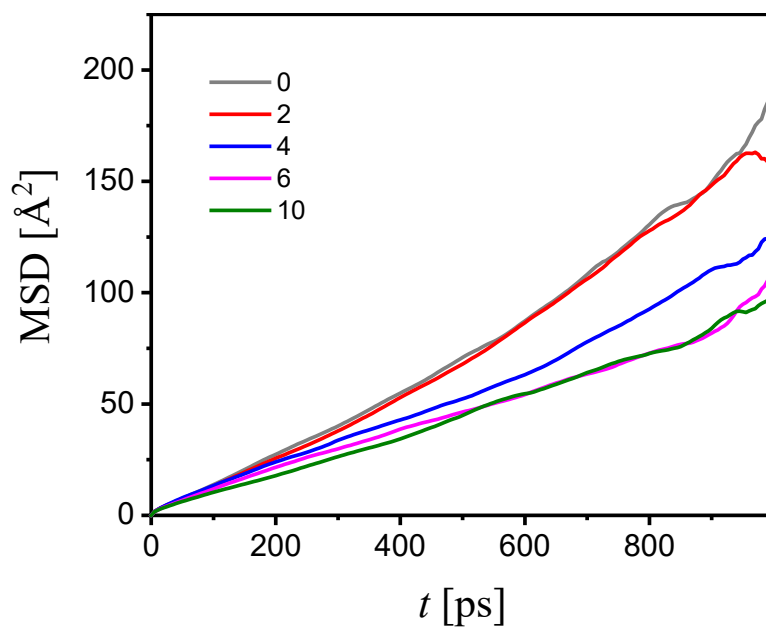

**Figure. S5.** Mean square displacement (MSD) curves of  $\text{OH}^-$  particles at 298 K during 1 ns MD simulation performed in the systems containing 0, 2, 4, 6, and 10 SDS molecules, respectively.

**Figure. S6**

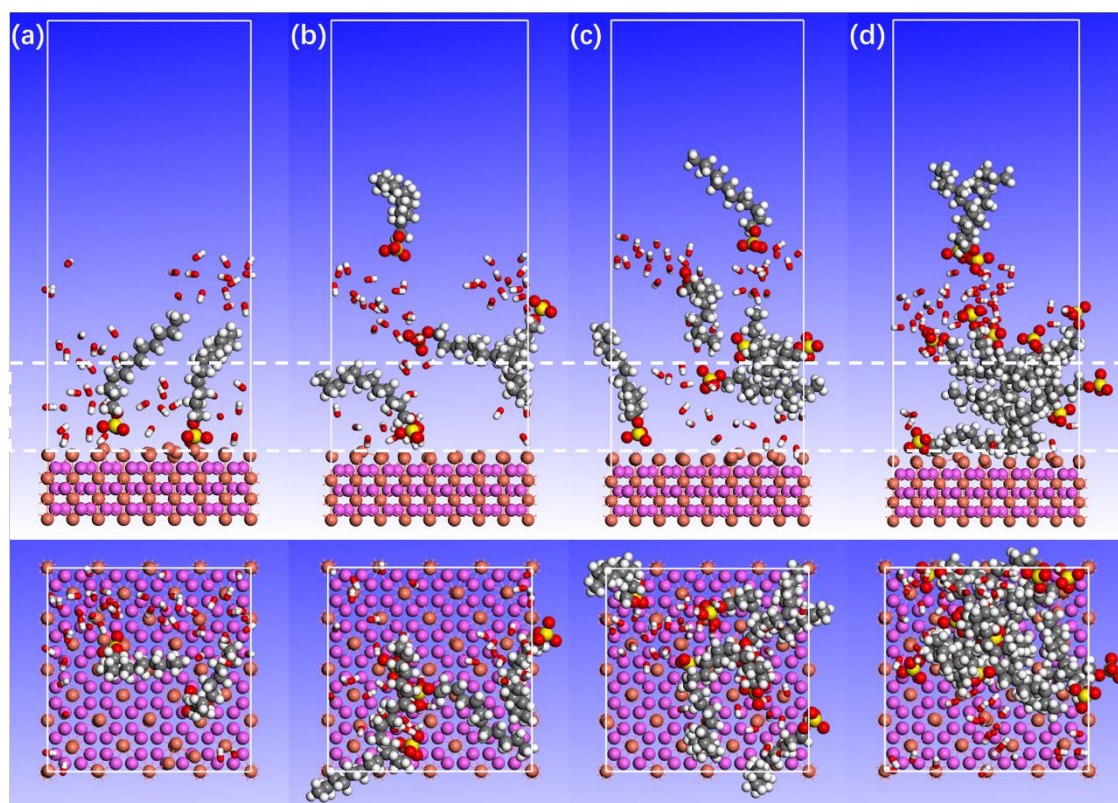

**Figure. S6.** Equilibrium configurations (up: side view, bottom: top view) of the systems containing (a) 2, (b) 4, (c) 6, and (d) 10 SDS molecules, respectively. The dashed rectangular shape denotes the lower part of solution layer close to the alloy surface. For clarity,  $\text{H}_2\text{O}$  and  $\text{Na}^+$  particles are not shown. The uppermost layer contacting electrolyte are Cu atoms. The color conventions of the specimen follow those in Figure. 4 in main text.
